# Supplementary material for: Psychiatric Status and Work Performance of Veterans of Operations Enduring Freedom and Iraqi Freedom
Source: Atypon-hosted journal article supplement (doi:10.1176/ps.62.1.pss6201_0039), 2011-01-01
Supplement: Adler DS.pdf [file Adler%20DS.pdf]

**Supplemental Table. Unadjusted Associations among WLQ Subscale Scores, Work Productivity Loss, and Work Productivity Cost and Sociodemographic/Background Characteristics and Mental Health/Substance Use Assessment Outcomes (n=473).**

|                                                                           | Work Limitations Questionnaire Subscale |                  |                               |                |                   |             |
|---------------------------------------------------------------------------|-----------------------------------------|------------------|-------------------------------|----------------|-------------------|-------------|
|                                                                           | Time Management                         | Physical Demands | Mental/ Interpersonal Demands | Output Demands | Productivity Loss |             |
| <b>Sociodemographic/ Background Characteristics</b>                       |                                         |                  |                               |                |                   |             |
| <i>Employment Type</i>                                                    |                                         |                  |                               |                |                   |             |
| Full time                                                                 | 32.7 ± 32.1                             | 34.0 ± 33.4      | 27.7 ± 27.4                   | 17.9 ± 27.81   | 6.9 ± 6.1         |             |
| Part time                                                                 | 29.4 ± 33.3                             | 33.9 ± 35.2      | 26.6 ± 29.8                   | 20.2 ± 28.52   | 6.8 ± 6.4         |             |
|                                                                           | <i>F</i> (1,471),<br><i>p</i> -value    | .75, .39         | .001, .98                     | .11, .75       | .48, .49          | .003, .96   |
| <i>Age Group</i>                                                          |                                         |                  |                               |                |                   |             |
| 18-29 years                                                               | 30.1 ± 31.4                             | 31.2 ± 32.4      | 25.8 ± 27.2                   | 17.0 ± 27.37   | 6.4 ± 5.9         |             |
| 30-39 years                                                               | 35.6 ± 32.7                             | 38.2 ± 36.1      | 29.8 ± 27.2                   | 17.7 ± 28.13   | 7.3 ± 6.3         |             |
| 40 years old and over                                                     | 32.0 ± 33.3                             | 34.4 ± 33.3      | 28.0 ± 29.3                   | 20.9 ± 28.61   | 7.2 ± 6.4         |             |
|                                                                           | <i>F</i> (2,470),<br><i>p</i> -value    | 1.12, .33        | 1.72, .18                     | .81, .45       | .84, .43          | 1.00, .37   |
| <i>Gender</i>                                                             |                                         |                  |                               |                |                   |             |
| Female                                                                    | 39.5 ± 31.0                             | 36.2 ± 34.9      | 31.8 ± 28.4                   | 27.2 ± 29.9    | 8.5 ± 6.4         |             |
| Male                                                                      | 31.1 ± 32.4                             | 33.7 ± 33.6      | 26.9 ± 27.7                   | 17.1 ± 27.5    | 6.6 ± 6.1         |             |
|                                                                           | <i>F</i> (1,471),<br><i>p</i> -value    | 3.41, .07        | .28, .60                      | 1.56, .21      | 6.63, .01         | 4.63, .03   |
| <i>Relationship Status</i>                                                |                                         |                  |                               |                |                   |             |
| Married/Partnered                                                         | 34.8 ± 33.5                             | 37.9 ± 35.33     | 28.3 ± 28.89                  | 18.6 ± 28.0    | 7.2 ± 6.3         |             |
| Single                                                                    | 29.9 ± 31.3                             | 30.9 ± 32.1      | 26.9 ± 27.0                   | 18.1 ± 27.9    | 6.6 ± 6.0         |             |
|                                                                           | <i>F</i> (1,471),<br><i>p</i> -value    | 2.72, .10        | 5.09, .02                     | .30, .58       | .03, .86          | 1.13, .29   |
| <i>Ethnicity</i>                                                          |                                         |                  |                               |                |                   |             |
| Other                                                                     | 34.2 ± 32.5                             | 38.3 ± 34.1      | 30.0 ± 27.8                   | 21.3 ± 29.1    | 7.6 ± 6.3         |             |
| Non-Hispanic White                                                        | 30.9 ± 32.2                             | 31.4 ± 33.3      | 26.1 ± 27.2                   | 16.6 ± 27.1    | 6.4 ± 6.0         |             |
|                                                                           | <i>F</i> (1,471),<br><i>p</i> -value    | 1.18, .28        | 4.58, .03                     | 2.18, .14      | 3.24, .07         | 4.04, .05   |
| <i>Financial Situation</i>                                                |                                         |                  |                               |                |                   |             |
| Have at least enough to get by                                            | 31.2 ± 32.0                             | 32.9 ± 33.7      | 26.1 ± 26.8                   | 17.4 ± 27.3    | 6.6 ± 6.0         |             |
| Can't make ends meet                                                      | 39.1 ± 35.6                             | 42.1 ± 31.7      | 37.7 ± 33.2                   | 25.0 ± 31.5    | 9.0 ± 6.8         |             |
|                                                                           | <i>F</i> (1,471),<br><i>p</i> -value    | 2.94, .09        | 3.60, .06                     | 8.58, .004     | 3.59, .06         | 7.28, .01   |
| <i>Significant Head Injury</i>                                            |                                         |                  |                               |                |                   |             |
| No                                                                        | 28.2 ± 31.3                             | 30.3 ± 33.2      | 24.4 ± 26.2                   | 16.8 ± 26.5    | 6.2 ± 5.9         |             |
| Yes                                                                       | 37.5 ± 33.0                             | 39.5 ± 33.7      | 31.5 ± 29.5                   | 19.9 ± 29.4    | 7.8 ± 6.4         |             |
|                                                                           | <i>F</i> (1,466),<br><i>p</i> -value    | 9.45, .002       | 8.50, .004                    | 7.55, .01      | 1.41, .24         | 8.02, .01   |
| <i>Taken Medication for Depression, Anxiety, or Nerves in Prior Month</i> |                                         |                  |                               |                |                   |             |
| No                                                                        | 30.2 ± 32.5                             | 32.3 ± 33.7      | 26.5 ± 28.2                   | 17.0 ± 27.8    | 6.5 ± 6.1         |             |
| Yes                                                                       | 37.0 ± 31.4                             | 38.3 ± 33.5      | 30.2 ± 26.7                   | 21.8 ± 28.2    | 7.8 ± 6.1         |             |
|                                                                           | <i>F</i> (1,471),<br><i>p</i> -value    | 4.27, .04        | 2.97, .09                     | 1.67, .20      | 2.76, .10         | 4.31, .04   |
| <i>SF-12 Mental Component Score</i>                                       |                                         |                  |                               |                |                   |             |
|                                                                           | <i>r</i> , <i>p</i> -value              | -.45, <.001      | -.23, <.001                   | -.51, <.001    | -.37, <.001       | -.51, <.001 |
| <i>SF-12 Physical Component Score</i>                                     |                                         |                  |                               |                |                   |             |
|                                                                           | <i>r</i> , <i>p</i> -value              | -.22, <.001      | -.16, <.001                   | -.11, .02      | -.21, <.001       | -.21, <.001 |
| <b>Mental Health/Substance</b>                                            |                                         |                  |                               |                |                   |             |

|                                                        |  | Work Limitations Questionnaire Subscale |                  |                               |                |                   |              |
|--------------------------------------------------------|--|-----------------------------------------|------------------|-------------------------------|----------------|-------------------|--------------|
|                                                        |  | Time Management                         | Physical Demands | Mental/ Interpersonal Demands | Output Demands | Productivity Loss |              |
| <b>Use Assessment Outcomes</b>                         |  |                                         |                  |                               |                |                   |              |
| <b>Depressive Symptom Severity ± PHQ-9</b>             |  | <i>r, p-value</i>                       | .44, <.001       | .24, <.001                    | .50, <.001     | .37, <.001        | .51, <.001   |
| <b>Major Depression</b>                                |  |                                         |                  |                               |                |                   |              |
| No                                                     |  |                                         | 25.3 ± 29.6      | 29.9 ± 33.7                   | 19.9 ± 23.5    | 13.2 ± 24.2       | 5.3 ± 5.3    |
| Yes                                                    |  |                                         | 47.4 ± 33.0      | 43.1 ± 31.9                   | 44.6 ± 29.7    | 29.8 ± 32.2       | 10.4 ± 6.4   |
|                                                        |  | <i>F</i> (1,471),<br><i>p-value</i>     | 52.18, <.001     | 15.87, <.001                  | 94.51, <.001   | 38.36, <.001      | 82.15, <.001 |
| <b>Suicide Ideation Severity</b>                       |  |                                         |                  |                               |                |                   |              |
| Non-High Risk                                          |  |                                         | 30.0 ± 32.0      | 33.2 ± 33.9                   | 25.7 ± 26.9    | 16.2 ± 26.4       | 6.4 ± 5.9    |
| High Risk                                              |  |                                         | 43.2 ± 31.7      | 37.8 ± 32.8                   | 37.0 ± 30.9    | 29.7 ± 32.9       | 9.4 ± 7.0    |
|                                                        |  | <i>F</i> (1,471),<br><i>p-value</i>     | 10.68, .001      | 1.16, .28                     | 10.46, .001    | 15.10, <.001      | 14.96, <.001 |
| <b>PTSD Symptom Severity ± PCL</b>                     |  | <i>r, p-value</i>                       | .40, <.001       | .22, <.001                    | .41, <.001     | .35, <.001        | .45, <.001   |
| <b>PTSD</b>                                            |  |                                         |                  |                               |                |                   |              |
| No                                                     |  |                                         | 23.0 ± 29.1      | 29.0 ± 33.6                   | 19.4 ± 24.6    | 11.8 ± 24.3       | 5.0 ± 5.3    |
| Yes                                                    |  |                                         | 43.2 ± 32.6      | 40.1 ± 33.0                   | 37.5 ± 28.4    | 26.4 ± 30.0       | 9.2 ± 6.3    |
|                                                        |  | <i>F</i> (1,471),<br><i>p-value</i>     | 50.42, <.001     | 13.05, <.001                  | 55.57, <.001   | 34.10, <.001      | 63.45, <.001 |
| <b>Generalized Anxiety Disorder &amp;/or Panic</b>     |  |                                         |                  |                               |                |                   |              |
| No                                                     |  |                                         | 21.3 ± 26.9      | 28.8 ± 33.8                   | 18.6 ± 24.3    | 11.2 ± 23.30      | 4.8 ± 5.1    |
| Yes                                                    |  |                                         | 46.0 ± 33.5      | 40.6 ± 32.6                   | 38.9 ± 28.0    | 27.5 ± 30.63      | 9.6 ± 6.3    |
|                                                        |  | <i>F</i> (1,471),<br><i>p-value</i>     | 79.05, <.001     | 14.88, <.001                  | 71.06, <.001   | 43.16, <.001      | 84.41, <.001 |
| <b>Binges in Prior 3 Months</b>                        |  | <i>r, p-value</i>                       | .11, .01         | .10, .03                      | .14, .002      | .14, .002         | .16, <.001   |
| <b>Average Number of Alcoholic Drinks in Past Week</b> |  | <i>r, p-value</i>                       | .07, .16         | .08, .08                      | .09, .5        | .07, .11          | .10, .04     |
| <b>Alcohol Dependent &amp;/or Illicit Drug Use</b>     |  |                                         |                  |                               |                |                   |              |
| No                                                     |  |                                         | 30.3 ± 31.8      | 31.7 ± 33.6                   | 26.0 ± 27.4    | 16.3 ± 26.2       | 6.4 ± 6.0    |
| Yes                                                    |  |                                         | 39.9 ± 33.6      | 43.8 ± 32.8                   | 34.1 ± 28.9    | 27.0 ± 33.4       | 8.9 ± 6.5    |
|                                                        |  | <i>F</i> (1,471),<br><i>p-value</i>     | 6.43, .01        | 9.28, .002                    | 6.17, .01      | 10.65, .001       | 12.60, <.001 |

Note. Cell values represent estimates (means and standard deviations (M (SD)) or, where denoted, correlation coefficients (*r*)) from unadjusted, bivariate analyses of the association among sociodemographic, clinical, and psychiatric factors and WLQ subscales. Tests of significance included one-way ANOVA and Pearson correlations for categorical and continuous variables, respectively. Analyses were two-tailed. Continuous measures included the following: PHQ-9= Patient Health Questionnaire (range= 0-27, higher scores indicate greater symptomatology); PCL= Post-Traumatic Stress Disorder (PTSD) Patient Checklist (range=17-85, higher scores indicate greater symptomatology); SF-12 = Short Form Health Survey of the Medical Outcomes Study (range=0-100, higher scores indicate greater mental/physical functioning); Binges in prior 3 months (range=0-150); Average number of alcoholic drinks in past week (range=0=29). WLQ Subscale range (0-100) with the exception of Productivity Loss Subscale (range=0-25) and Productivity Cost (range=0-8116).
